# Supplementary material
Source: publisher figshare collection journal article supplement (https://karger.figshare.com/ndownloader/files/22448021)
Supplement: Supplementary file 1 [file 22448021]

**Novel clinical criteria allow detection of SHOX haploinsufficiency caused by either gene or enhancer region defects**

**Supplementary Table 1**

Description of *SHOX* variants and their corresponding classification

| **Nr.** | **Mutation** | **Classification** |
| --- | --- | --- |
| 1 | P018-D1 del probes 6291-6291 ; 3'-flanking region 47.5 kb deletion [1] | Pathogenic |
| 2 | P018-B del probes 5642-6293 3'-flanking region | Pathogenic |
| 3 | Mozaic for deletion complete SHOX gene + flanking sequences | Pathogenic; mosaic |
| 4 | P018-E1 del probes 5642-9335 3'-flanking sequence | Pathogenic |
| 5 | P018-E1 del probes 5642-9335 3'-flanking sequence | Pathogenic |
| 6 | P018-D1 del probes 6291-6291 ; 47.5 kb deletion 3'-flanking sequence [1] | Pathogenic |
| 7 | 47.5 kb deletion (probes 318S and 432S) [1] | Pathogenic |
| 8 | P018-E1 del probes 5645-5646; 47.5 kb deletion 3'-flanking sequence [1] | Pathogenic |
| 9 | P018-D1 del probes 6291-6291 ; 47.5 kb deletion 3'-flanking sequence [1] | Pathogenic |
| 10 | P018-D1 del probes 6291-6291 ; 47.5 kb deletion 3'-flanking sequence [1] | Pathogenic |
| 11 | P018-E1 del 5642-10251; deletion 3'-flanking region | Pathogenic |
| 12 | P018-E1 del probes 5645-5646; 47.5 kb deletion 3'-flanking sequence [1] | Pathogenic |
| 13 | P018-D1 del probes 6291-6291 ; 47.5 kb deletion 3'-flanking sequence [1] | Pathogenic |
| 14 | P018-C del probes 5642-9334 deletion 3'-flanking sequence | Pathogenic |
| 15 | P018-D1 del probes 6291-6291 ; 47.5 kb deletion 3'-flanking sequence [1] | Pathogenic |
| 16 | P018-D1 del probes 6291-6291 ; 47.5 kb deletion 3'-flanking sequence [1] | Pathogenic |
| 17 | P018-D1 del probes 5642-6293 deletion 3'-flanking region [1] | Pathogenic |
| 18 | 47.5 kb deletion (probes 136-428) [1] | Pathogenic |
| 19 | P018-D1 del probe 9333-L10292; 5'-flanking region | VUS* |
| 20 | P018-D1 del probe 9333-L10292; 5’-flanking region | VUS* |
| 21 | Complete gene including 5' and3'-flanking sequences | Pathogenic |
| 22 | Complete gene including 5' and 3'-flanking sequences | Pathogenic |
| 23 | Complete gene including 5' and 3'-flanking sequences | Pathogenic |
| 24 | Complete gene including 5' and 3'-flanking sequences | Pathogenic |
| 25 | Complete gene deletion | Pathogenic |
| 26 | P018-B del probes 5642-6293 3'-flanking region | Pathogenic |
| 27 | Partial gene deletion exon 3-7; P018B 1147-9336 | Pathogenic |
| 28 | Complete gene deletion | Pathogenic |
| 29 | Complete gene deletion | Pathogenic |
| 30 | Complete gene deletion | Pathogenic |
| 31 | Complete gene deletion | Pathogenic |
| 32 | Complete gene deletion including 5' and 3'-flanking sequences | Pathogenic |
| 33 | Complete gene deletion including 5' and 3'-flanking sequences | Pathogenic |
| 34 | Complete gene deletion including 5' and 3'-flanking sequences | Pathogenic |
| 35 | P018-B del probes 5642-6293 3'-flanking region; | Pathogenic |
| 36 | Complete gene deletion including 5' and 3'-flanking sequences | Pathogenic |
| 37 | Complete gene deletion including 5' and 3'-flanking sequences | Pathogenic |
| 38 | Complete gene deletion including 5' and 3'-flanking sequences | Pathogenic |
| 39 | Complete gene deletion including 5' and 3'-flanking sequences | Pathogenic |
| 40 | P018-F1 del 1146-9336 partial gene deletion exon 2-6 | Pathogenic |
| 41 | Complete gene deletion | Pathogenic |
| 42 | Complete gene deletion including 5' and 3'-flanking sequences | Pathogenic |
| 43 | P018-F1 del 13296-1153 deletion 3'-flanking region | Pathogenic |
| 44 | Complete gene deletion including 5' and 3'-flanking sequences | Pathogenic |
| 45 | Partial gene deletion exon 4-7; P018B del [probes 1148-9336 | Pathogenic |
| 46 | Complete gene deletion including 3'-flanking sequences | Pathogenic |
| 47 | Complete gene deletion including 3'-flanking sequences | Pathogenic |
| 48 | Complete gene deletion including 5' and 3'-flanking sequences | Pathogenic |
| 49 | Complete gene deletion including 3'-flanking sequences | Pathogenic |
| 50 | Complete gene deletion | Pathogenic |
| 51 | Complete gene deletion including 5' and 3'-flanking sequences | Pathogenic |
| 52 | Complete gene deletion | Pathogenic |
| 53 | P018-D1 del probes 6291-6291 ; 47.5 kb deletion 3'-flanking sequence [1] | Pathogenic |
| 54 | Complete gene deletion | Pathogenic |
| 55 | Complete gene deletion including 5' and 3'-flanking sequences | Pathogenic |
| 56 | Complete gene deletion including 5' and 3'-flanking sequences | Pathogenic |
| 57 | Complete gene deletion including 5' and 3'-flanking sequences | Pathogenic |
| 58 | Complete gene deletion | Pathogenic |
| 59 | Complete gene deletion | Pathogenic |
| 60 | Complete gene deletion including 5' and 3'-flanking sequences | Pathogenic |
| 61 | Complete gene deletion including 5' and 3'-flanking sequences | Pathogenic |
| 62 | P018-F1 del probes 13297-1153; deletion 3'-flanking sequence | Pathogenic |
| 63 | Complete gene deletion including 5' and 3'-flanking sequences | Pathogenic |
| 64 | Complete gene deletion including 5' and 3'-flanking sequences | Pathogenic |
| 65 | c.427delg, p.(Glu158fs); Frameshift mutation | Pathogenic |
| 66 | c.583C>T, p.(Arg195)*; Nonsense mutation [2] and various publications | Pathogenic |
| 67 | c.1A>G p.(Met1); initiation codon mutation [3] | Pathogenic |
| 68 | c.503G>A, p.(Arg168Gln); Missense mutation [4] | Pathogenic |
| 69 | c.503G>A, p.(Arg168Gln); Missense mutation [4] | Pathogenic |
| 70 | c.623C>T p.(Pro208Leu); Missense mutation 1x in Esoterix (2007) SHOX locus-specific database | Pathogenic |
| 71 | P018-B del probes 5642-6293; deletion 3'-flanking region | Pathogenic |
| 72 | c.390_c.391ins28 p.(Glu131fs); frameshift mutation | Pathogenic |
| 73 | c.399G>C p.(Glu133Asp) Missense mutation [5] | Pathogenic |
| 74 | c.461T>C p.(Leu154Pro) Missense mutation [6, 7] | Pathogenic |
| 75 | c.698C>T p.(Ala233Val) ; Missense mutation [8]; Esoterix (2007) SHOX Locus-specific database | Pathogenic |
| 76 | c.691C>T p.(His231Tyr) ; Missense mutation; not published | VUS** |

MRC-Holland kit (P018) version and probe numbers are provided if necessary for the classification of the deletion [9]. Mutations detected by Sanger sequencing are described using HGVS for RefSeq NM_000451.3.

VUS: variant of uncertain significance.

*This upstream enhancer deletion was *in silico* classified as a class 3 variant of uncertain significance (VUS), and was observed in patients 19 and 20 from unrelated families. In patient 20, single nucleotide polymorphism (SNP) array analysis confirmed the presence of a deletion in this region (arr Xp22.33(1-416,314)x1 mat).

Auxological data of patient 19 are: height -1.9 SDS, sitting height to standing height (SH/H) ratio 2.6 SDS, and her arm span is unknown. Her father also carries the mutation, and his height is -1.5 SDS and SH/H ratio 2.0 SDS.

Auxological data of patient 20 are: height -2.5 SDS, SH/H ratio 0.8 SDS, arm span minus height -3.1 cm, and she shows bowing of the forearm and muscular hypertrophy. She was treated with recombinant human growth hormone. Her mother also carries the mutation, and her height is -0.6 SDS and SH/H ratio 0.8 SDS.

Given the typical phenotype in multiple subjects with this class of enhancer deletions, we consider this variant as likely pathogenic.

**This intragenic *SHOX* mutation was *in silico* classified as a variant of uncertain significance according to the ACMG/AMP classification (PM2, PP2, BP4). The variant is reported only once in the gnomAD reference database of control individuals (heterozygous in a European (non-Finnish) individual in 121016 alleles (MAF 0.00083%)) supporting the pathogenicity as described by Nykamp et al. [10].

The patient has a height of -2.8 SDS and SH/H ratio of 2.7 SDS. Her arm span is unknown. Her father also carries the mutation, and his height is -2.4 SDS and his SH/H ratio 1.5 SDS, thus fitting *SHOX* haploinsufficiency. Based on these considerations, we classified this variant to be possibly pathogenic.

**References**

1 Benito-Sanz S, Royo JL, Barroso E, Paumard-Hernandez B, Barreda-Bonis AC, Liu P, Gracia R, Lupski JR, Campos-Barros A, Gomez-Skarmeta JL, Heath KE: Identification of the first recurrent PAR1 deletion in Leri-Weill dyschondrosteosis and idiopathic short stature reveals the presence of a novel SHOX enhancer. J Med Genet 2012;49:442-450.

2 Rao E, Weiss B, Fukami M, Rump A, Niesler B, Mertz A, Muroya K, Binder G, Kirsch S, Winkelmann M, Nordsiek G, Heinrich U, Breuning MH, Ranke MB, Rosenthal A, Ogata T, Rappold GA: Pseudoautosomal deletions encompassing a novel homeobox gene cause growth failure in idiopathic short stature and Turner syndrome. Nat Genet 1997;16:54-63.

3 Wasniewska M, Raiola G, Nicoletti A, Galati MC, Messina MF, Mirabelli S, De Luca F: Severe SHOX gene haploinsufficiency in a girl with a novel mutation (M1T) involving the first codon of coding region. J Endocrinol Invest 2010;33:282-283.

4 Freire BL, Homma TK, Funari MFA, Lerario AM, Vasques GA, Malaquias AC, Arnhold IJP, Jorge AAL: Multigene Sequencing Analysis of Children Born Small for Gestational Age With Isolated Short Stature. J Clin Endocrinol Metab 2019;104:2023-2030.

5 Wolters B, Lass N, Wunsch R, Bockmann B, Austrup F, Reinehr T: Short stature before puberty: which children should be screened for SHOX deficiency? Horm Res Paediatr 2013;80:273-280.

6 Marstrand-Joergensen MR, Jensen RB, Aksglaede L, Duno M, Juul A: Prevalence of SHOX haploinsufficiency among short statured children. Pediatr Res 2017;81:335-341.

7 Ross JL, Scott C, Jr., Marttila P, Kowal K, Nass A, Papenhausen P, Abboudi J, Osterman L, Kushner H, Carter P, Ezaki M, Elder F, Wei F, Chen H, Zinn AR: Phenotypes Associated with SHOX Deficiency. J Clin Endocrinol Metab 2001;86:5674-5680.

8 Shima H, Tanaka T, Kamimaki T, Dateki S, Muroya K, Horikawa R, Kanno J, Adachi M, Naiki Y, Tanaka H, Mabe H, Yagasaki H, Kure S, Matsubara Y, Tajima T, Kashimada K, Ishii T, Asakura Y, Fujiwara I, Soneda S, Nagasaki K, Hamajima T, Kanzaki S, Jinno T, Ogata T, Fukami M: Systematic molecular analyses of SHOX in Japanese patients with idiopathic short stature and Leri-Weill dyschondrosteosis. J Hum Genet 2016;61:585-591.

9 Schouten JP, McElgunn CJ, Waaijer R, Zwijnenburg D, Diepvens F, Pals G: Relative quantification of 40 nucleic acid sequences by multiplex ligation-dependent probe amplification. Nucleic Acids Res 2002;30:e57.

10 Nykamp K, Anderson M, Powers M, Garcia J, Herrera B, Ho YY, Kobayashi Y, Patil N, Thusberg J, Westbrook M, Topper S: Sherloc: a comprehensive refinement of the ACMG-AMP variant classification criteria. Genet Med 2017;19:1105-1117.
